# Supplementary figures and images for: Protective effects of sesamol on systemic oxidative stress-induced cognitive impairments via regulation of Nrf2/Keap1 pathway
Source: Royal Society of Chemistry journal article supplement (doi:10.1039/c8fo01436a), 2018-01-01

**A**

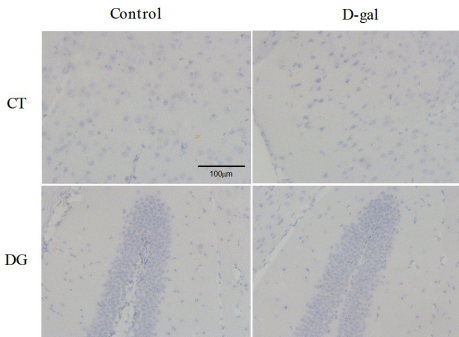

Supplement: c8fo01436a2.pdf [file c8fo01436a2.pdf]

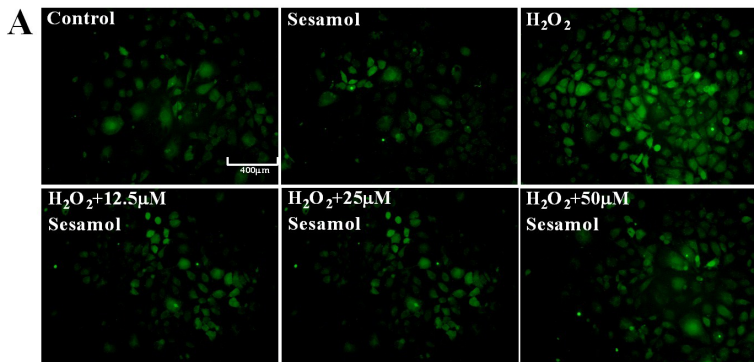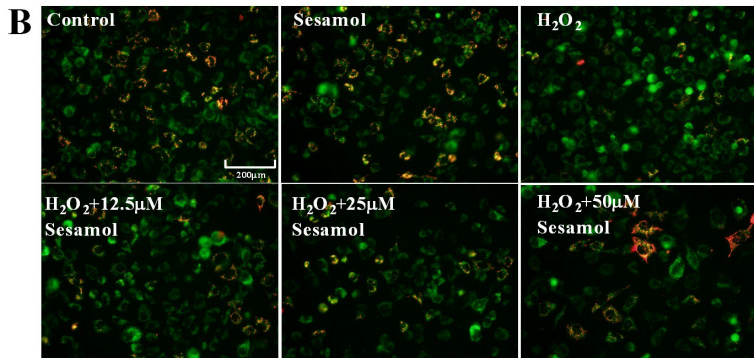

Supplement: c8fo01436a3.pdf [file c8fo01436a3.pdf]
